# Supplementary material
Source: PubMed Central journal article supplement (PMC3832957)

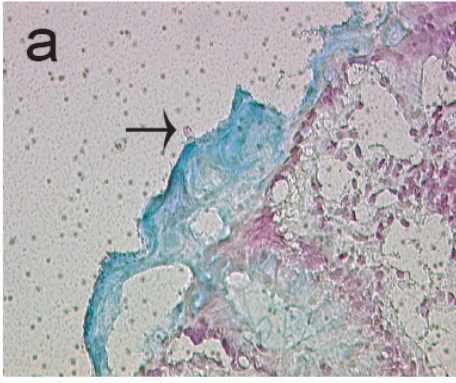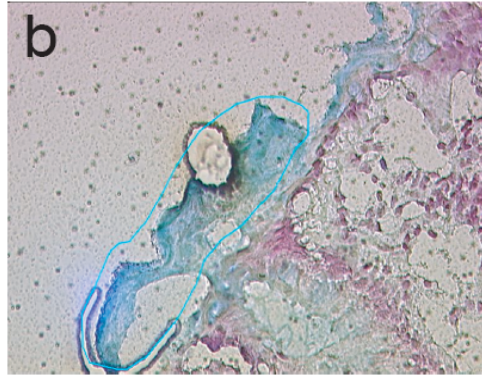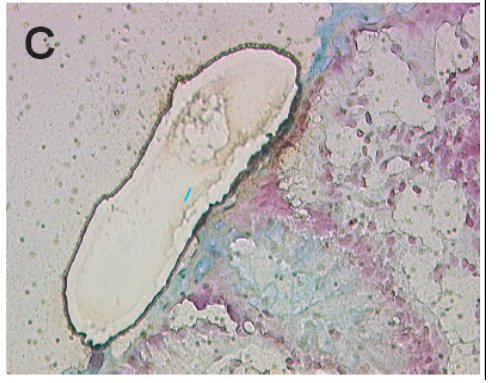

Supplement: NIHMS485878-supplement-Sup_1.pdf [file NIHMS485878-supplement-Sup_1.pdf]

## RIGHT COLON

## LEFT COLON

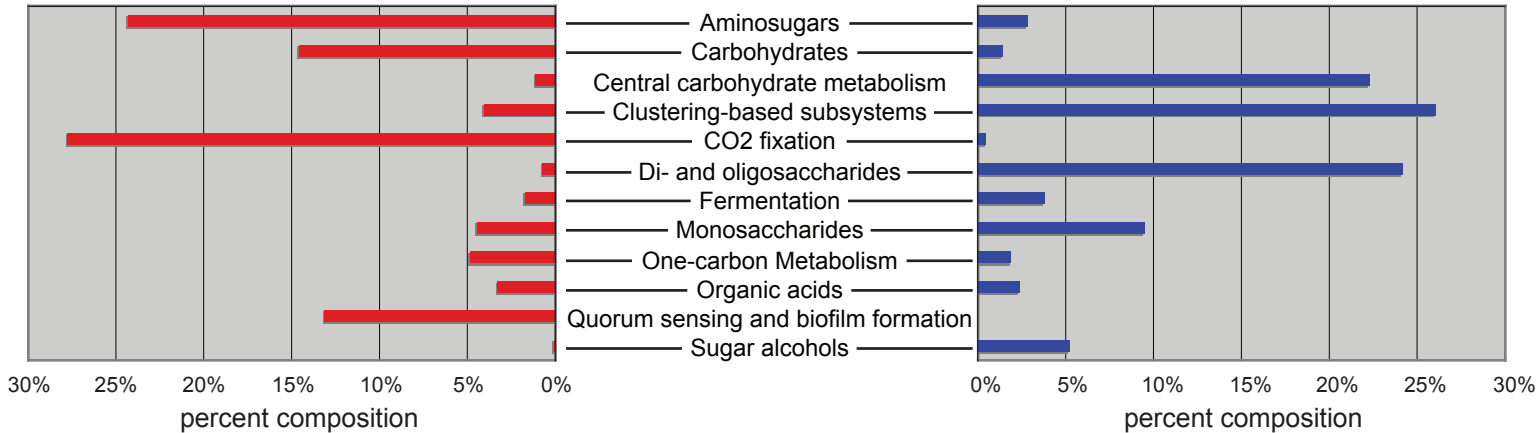

Supplement: NIHMS485878-supplement-supp_4.pdf [file NIHMS485878-supplement-supp_4.pdf]
